# Supplementary material for: Analysing microbiome intervention design studies: Comparison of alternative multivariate statistical methods
Source: PubMed Central journal article supplement (PMC8601541; doi:10.1371/journal.pone.0259973), 2021-11-18

# (A) Moen data set

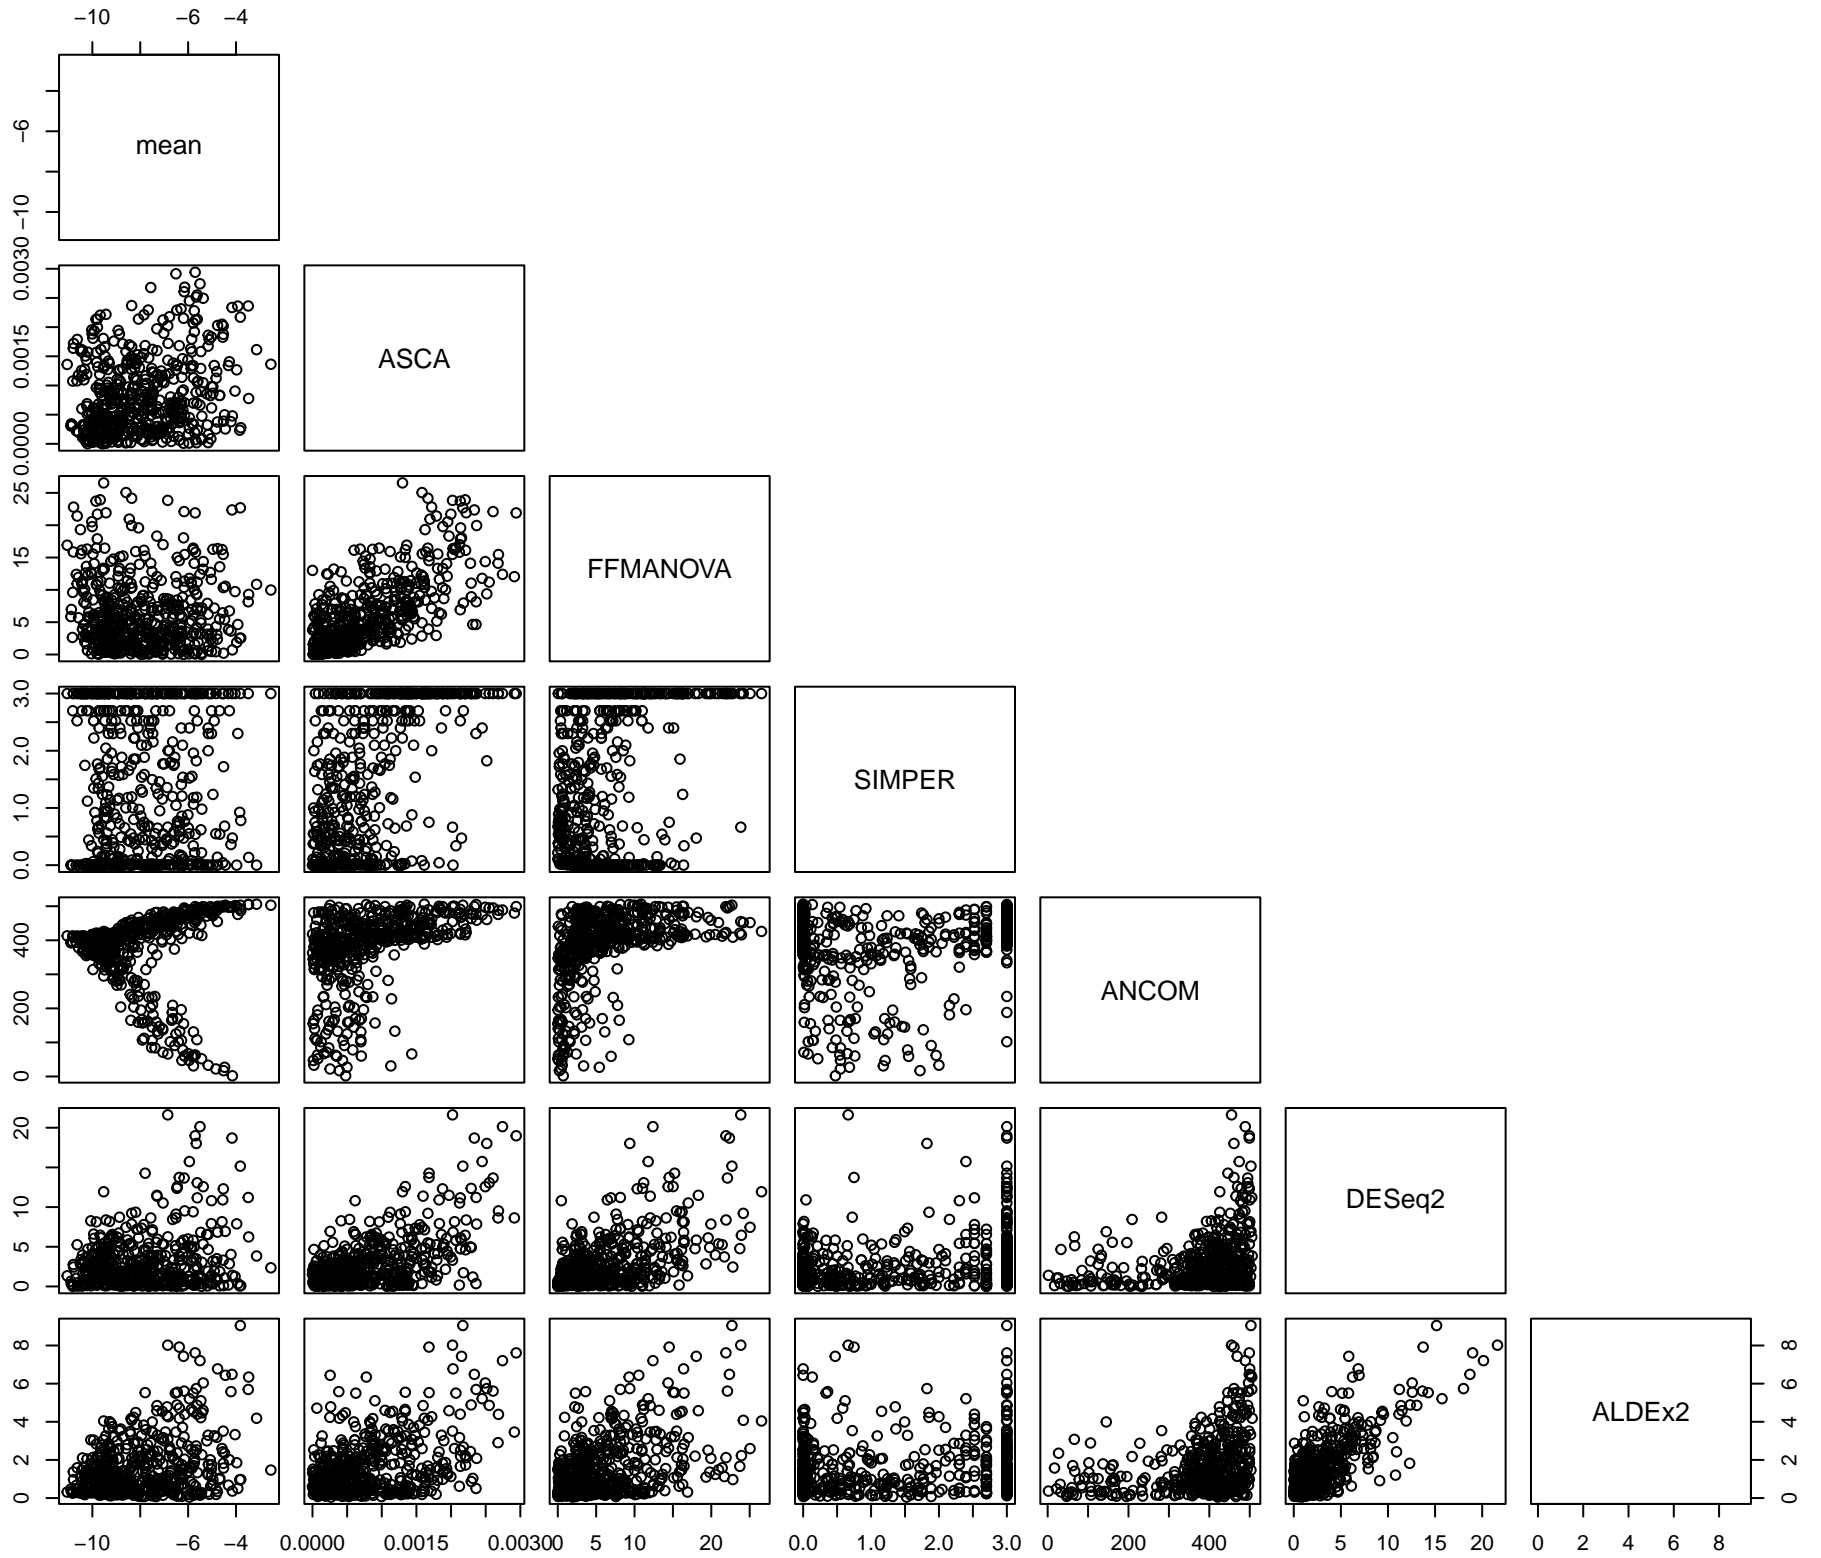

## (B) Lai data set

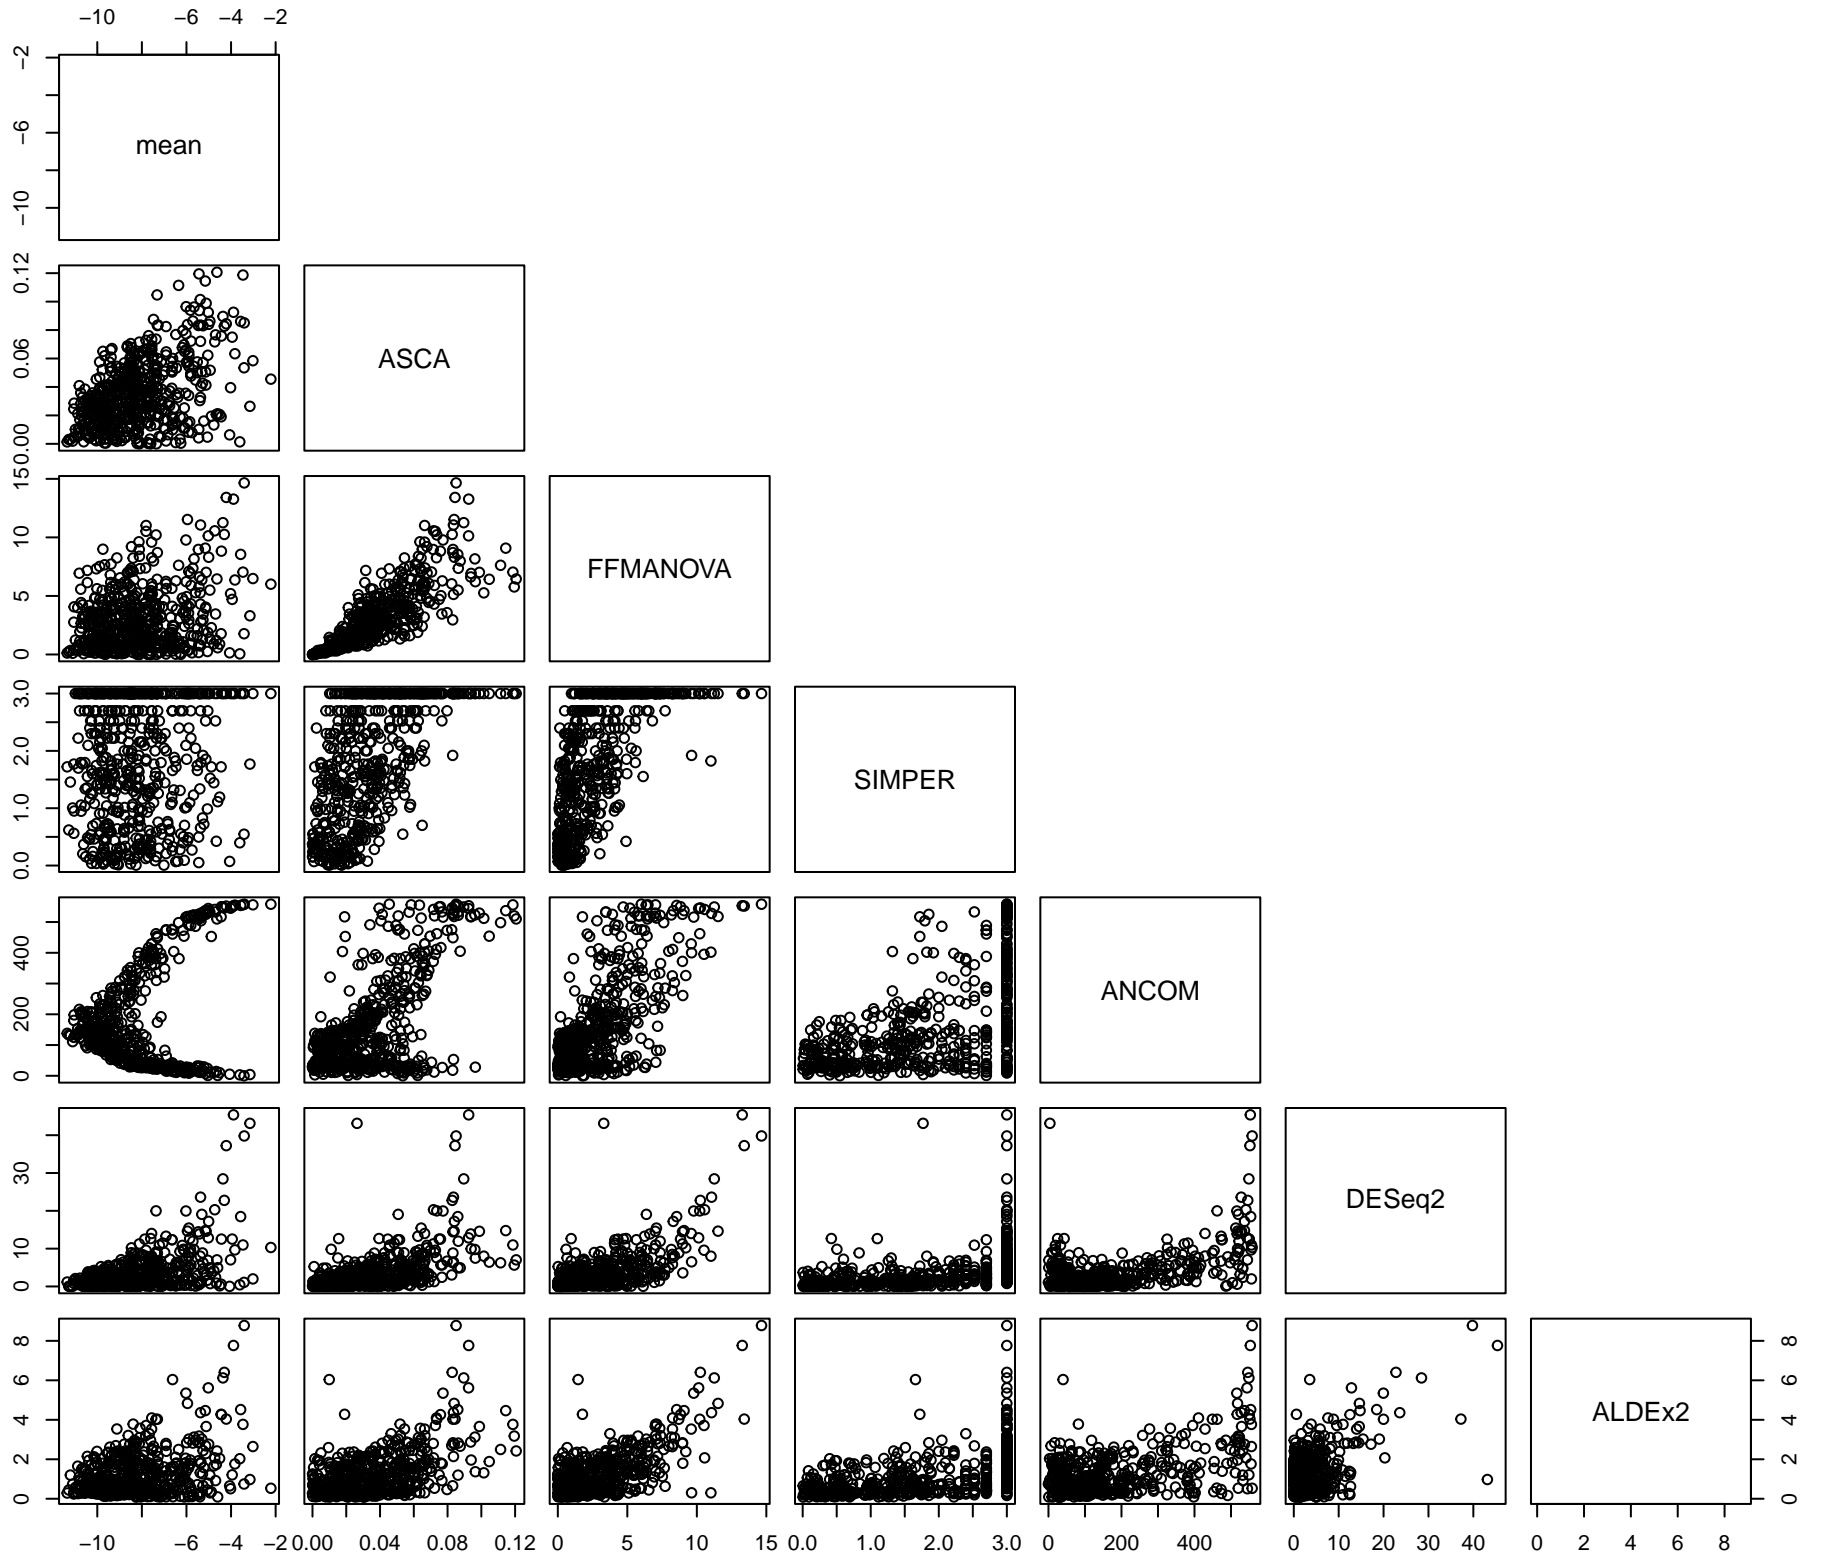

### (C) Le Sciellour data set

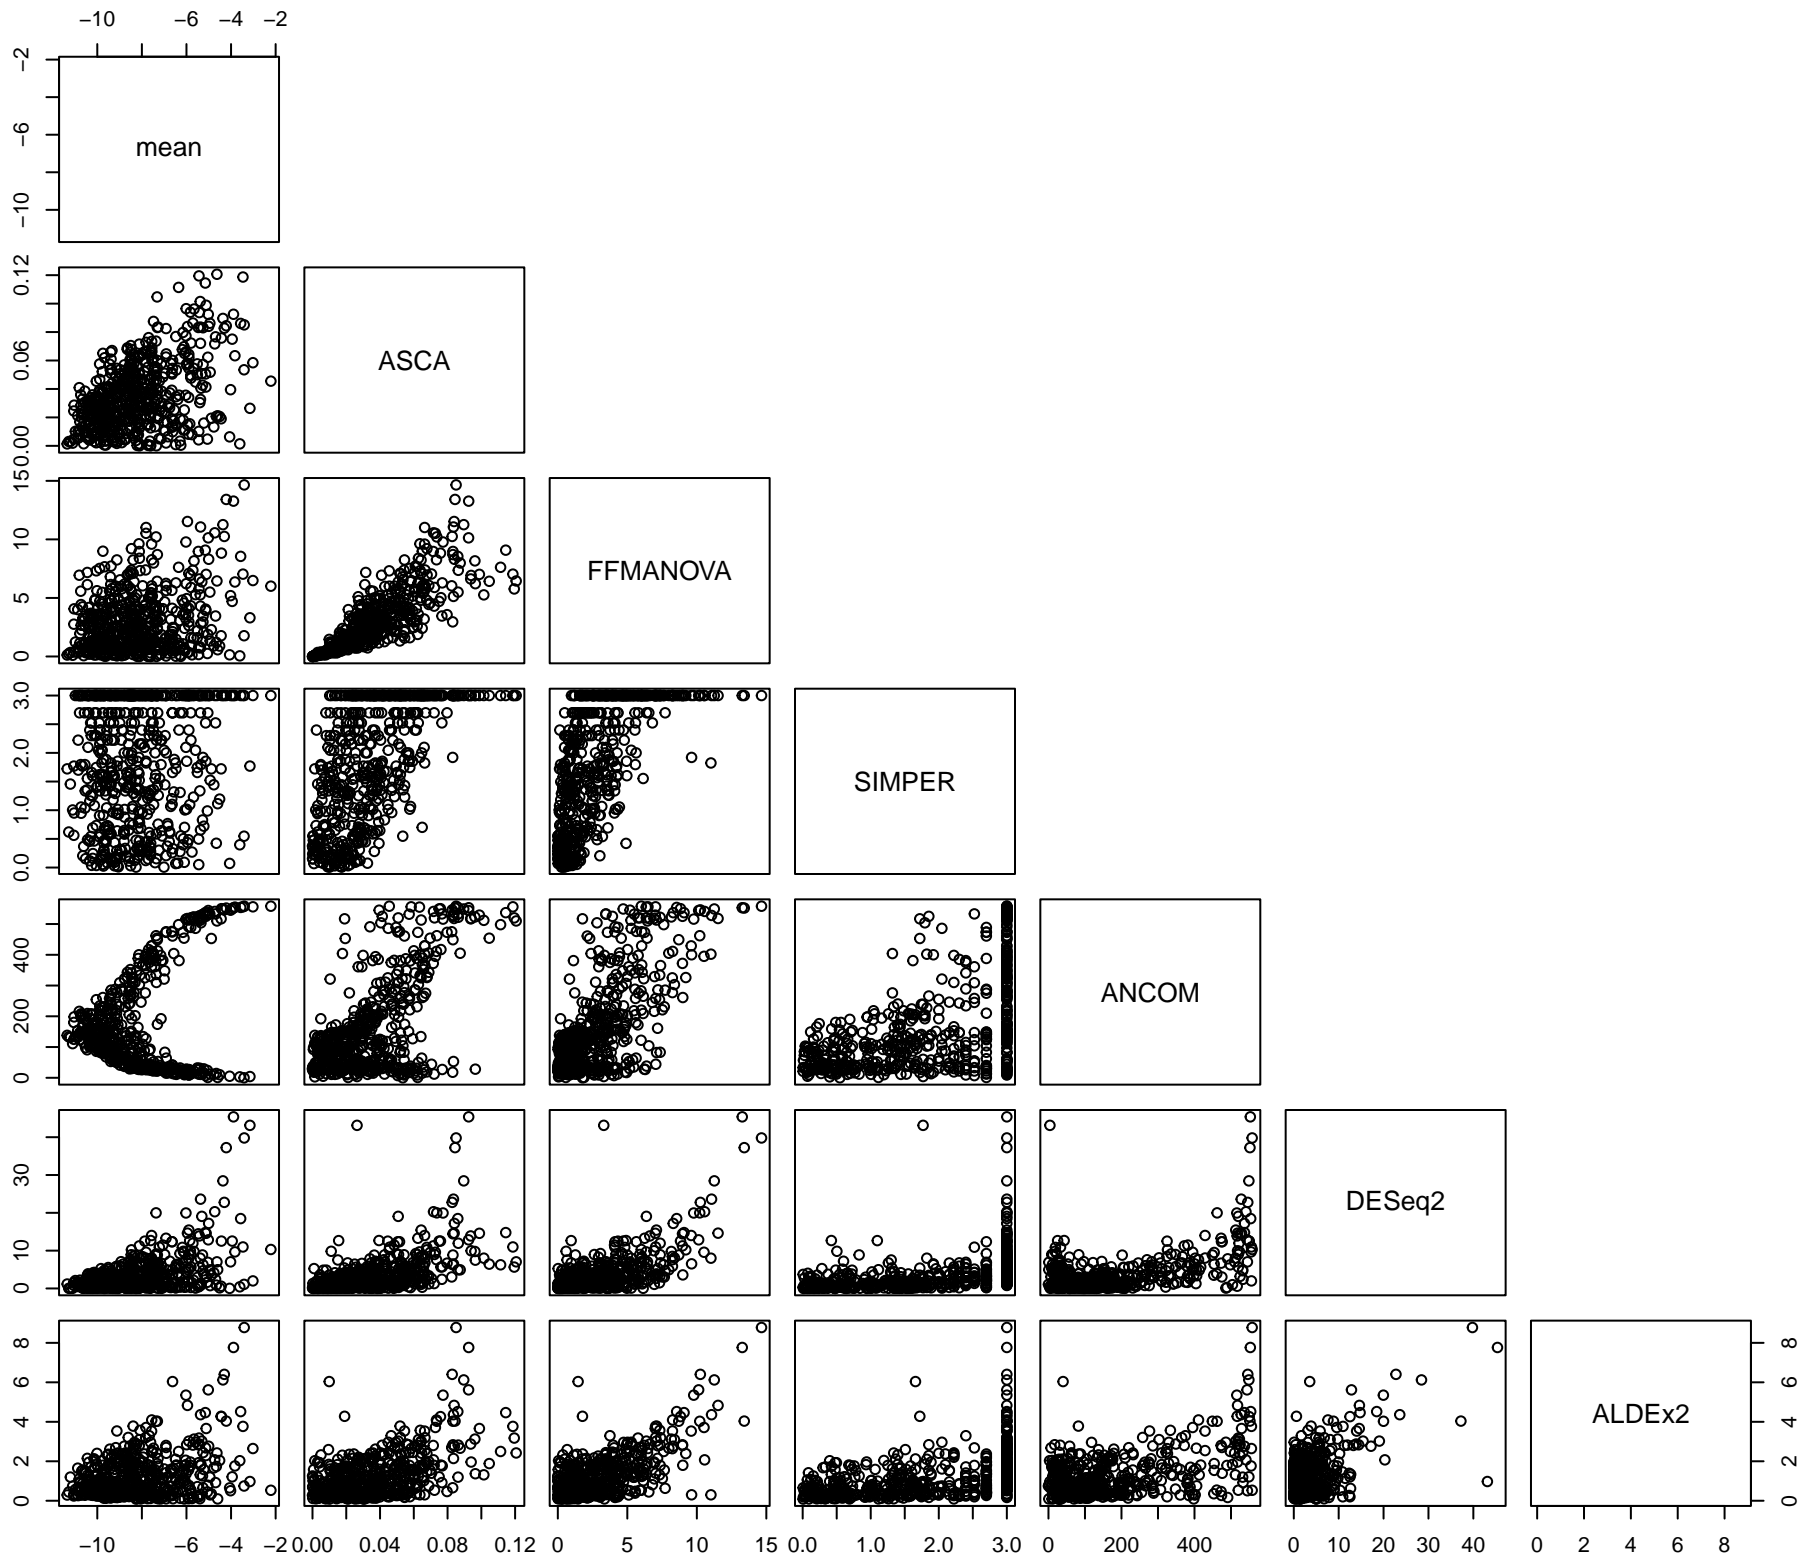

# (D) Wang data set

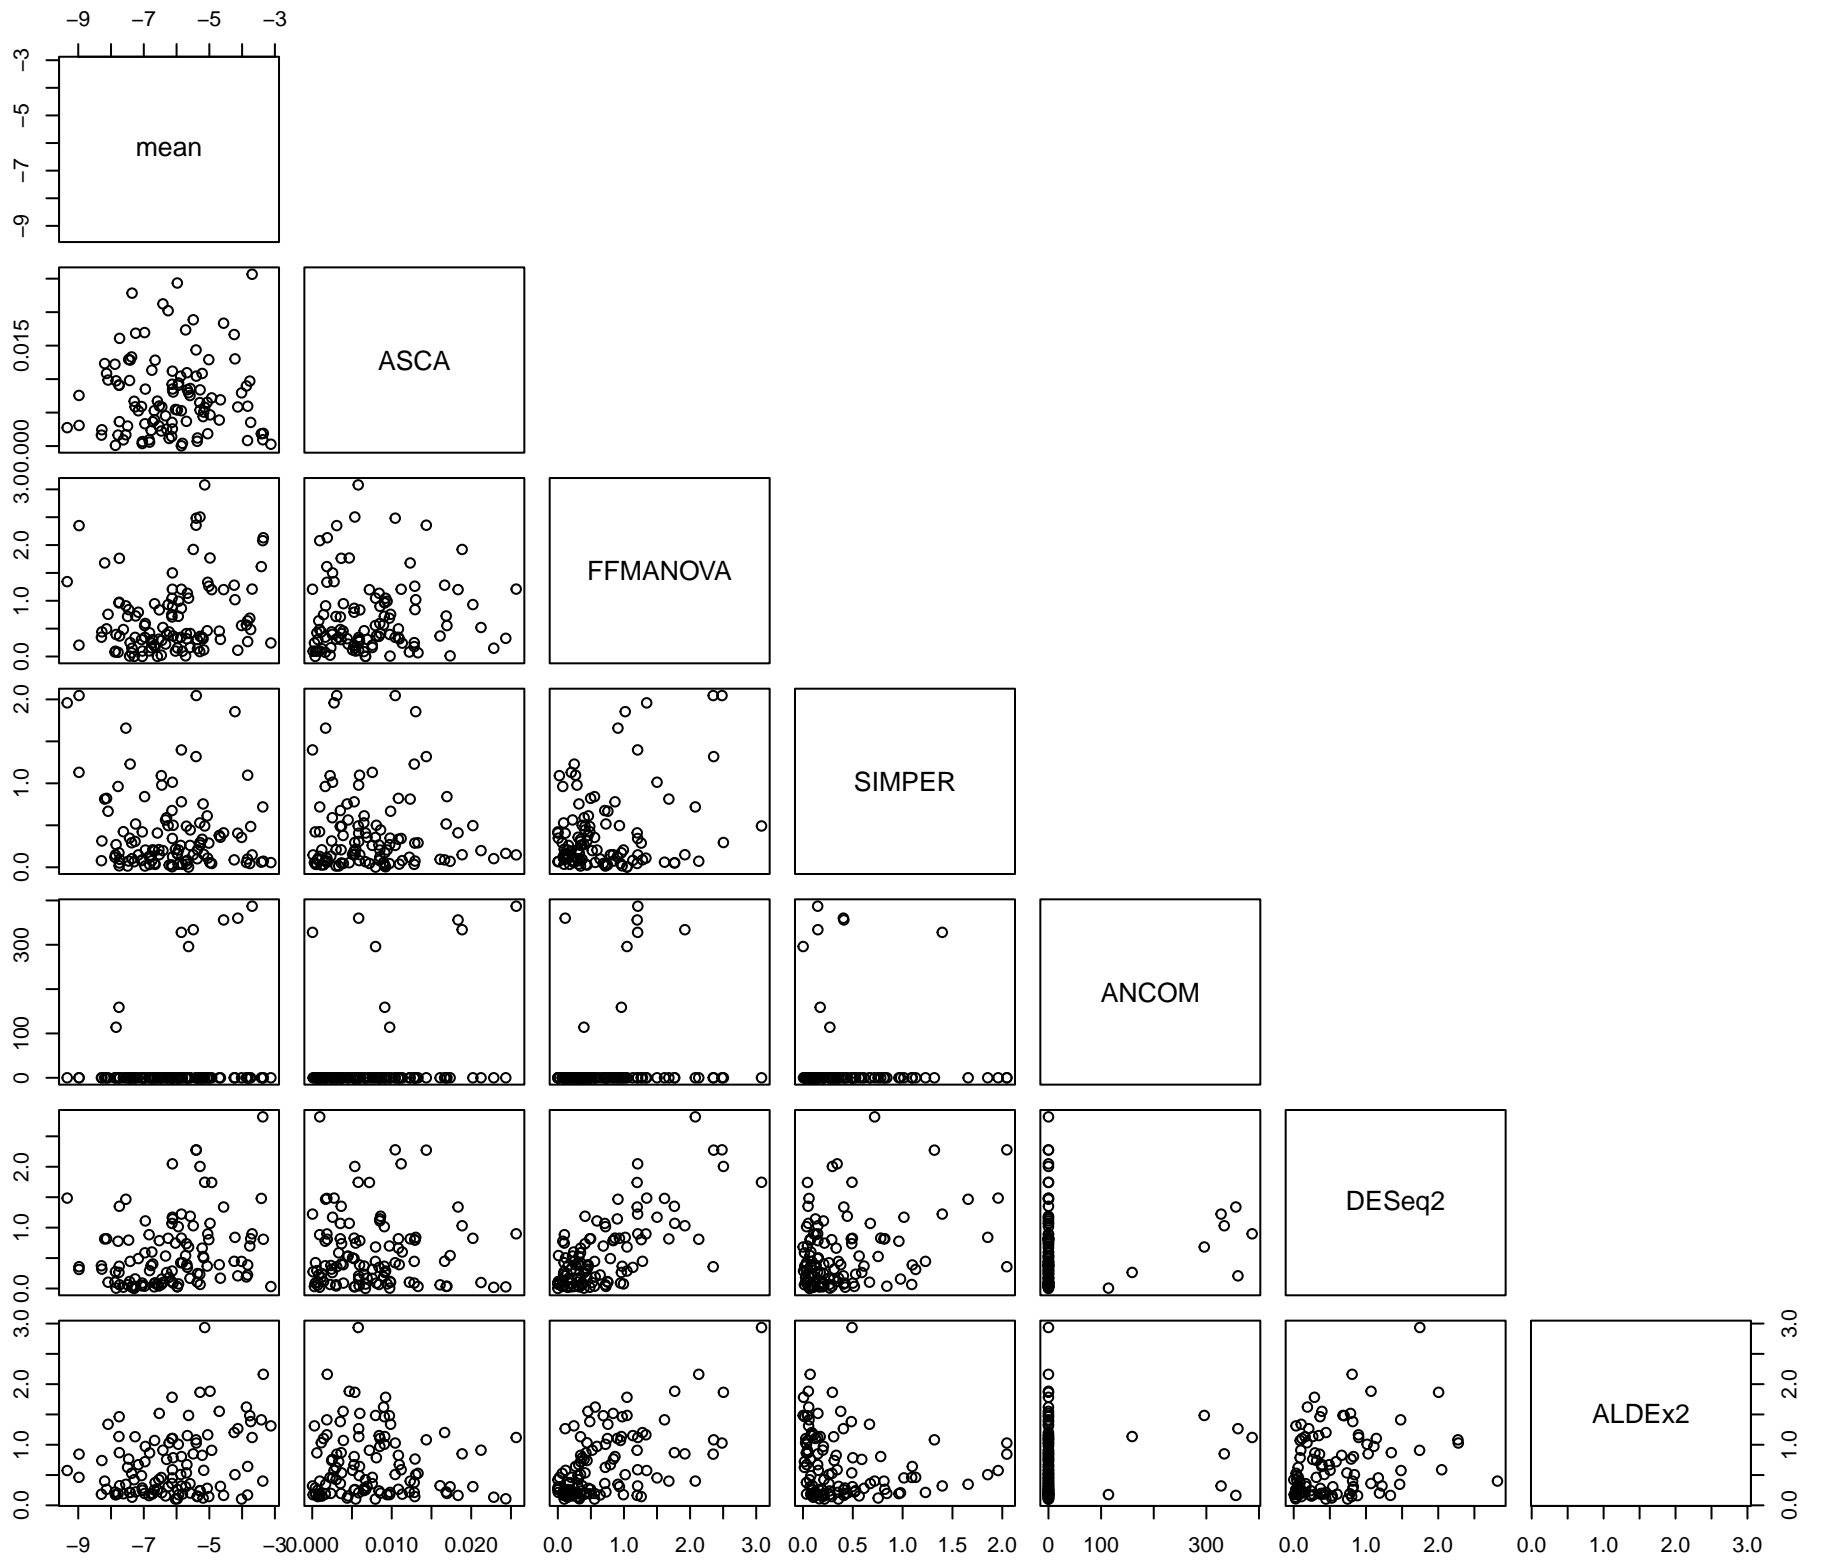

# (E) Birkeland data set

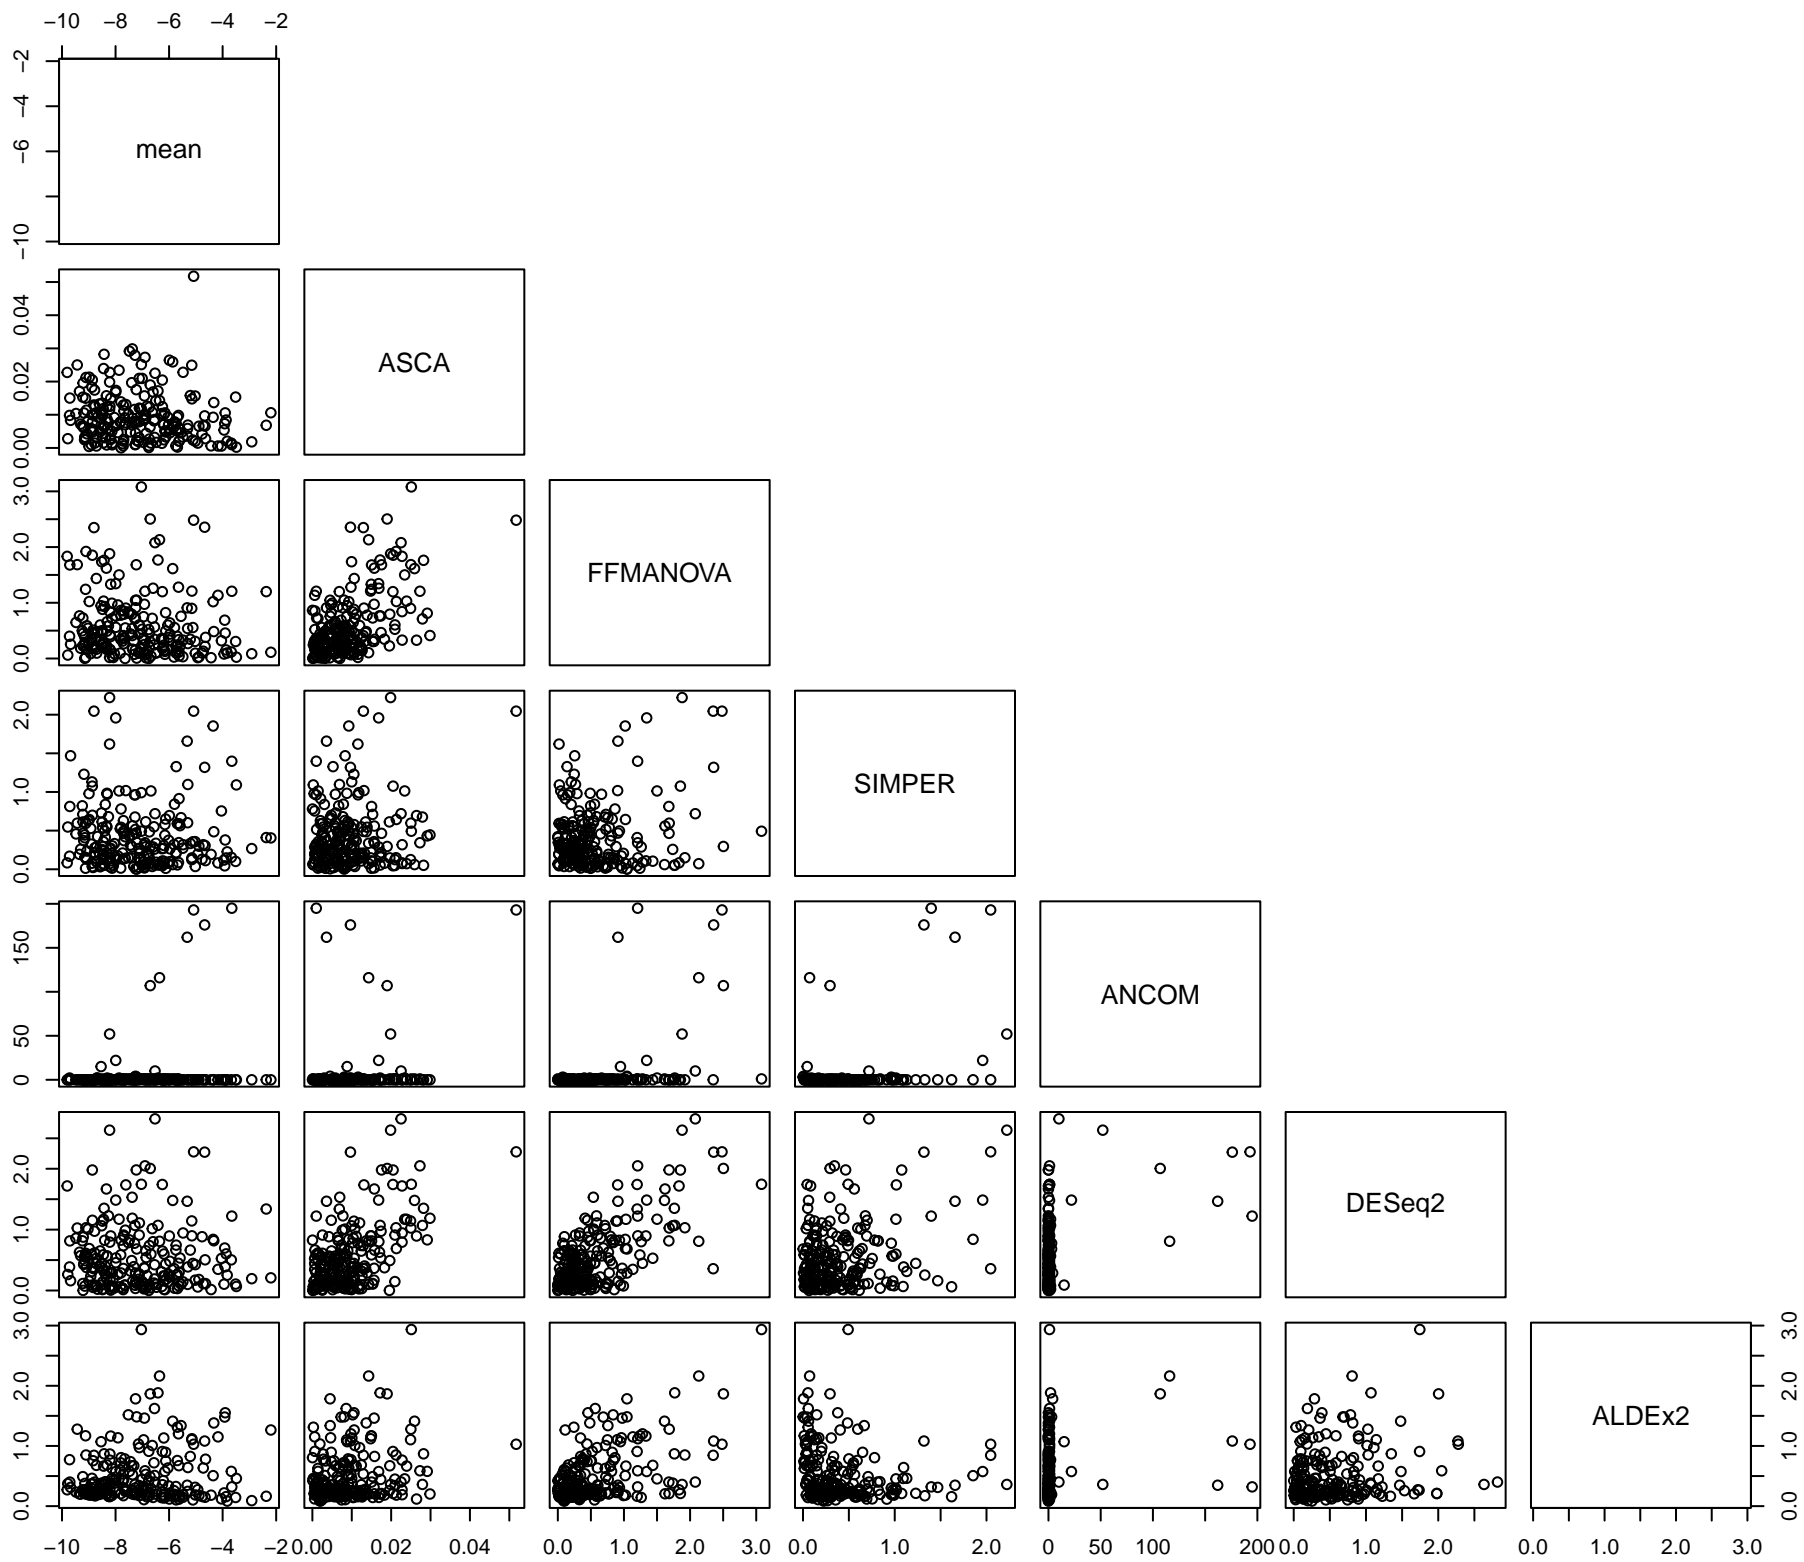

Supplement: pone.0259973.s001.pdf [file pone.0259973.s001.pdf]
