# Supplementary material for: Analysing microbiome intervention design studies: Comparison of alternative multivariate statistical methods
Source: PubMed Central journal article supplement (PMC8601541; doi:10.1371/journal.pone.0259973), 2021-11-18

# Few\_Low

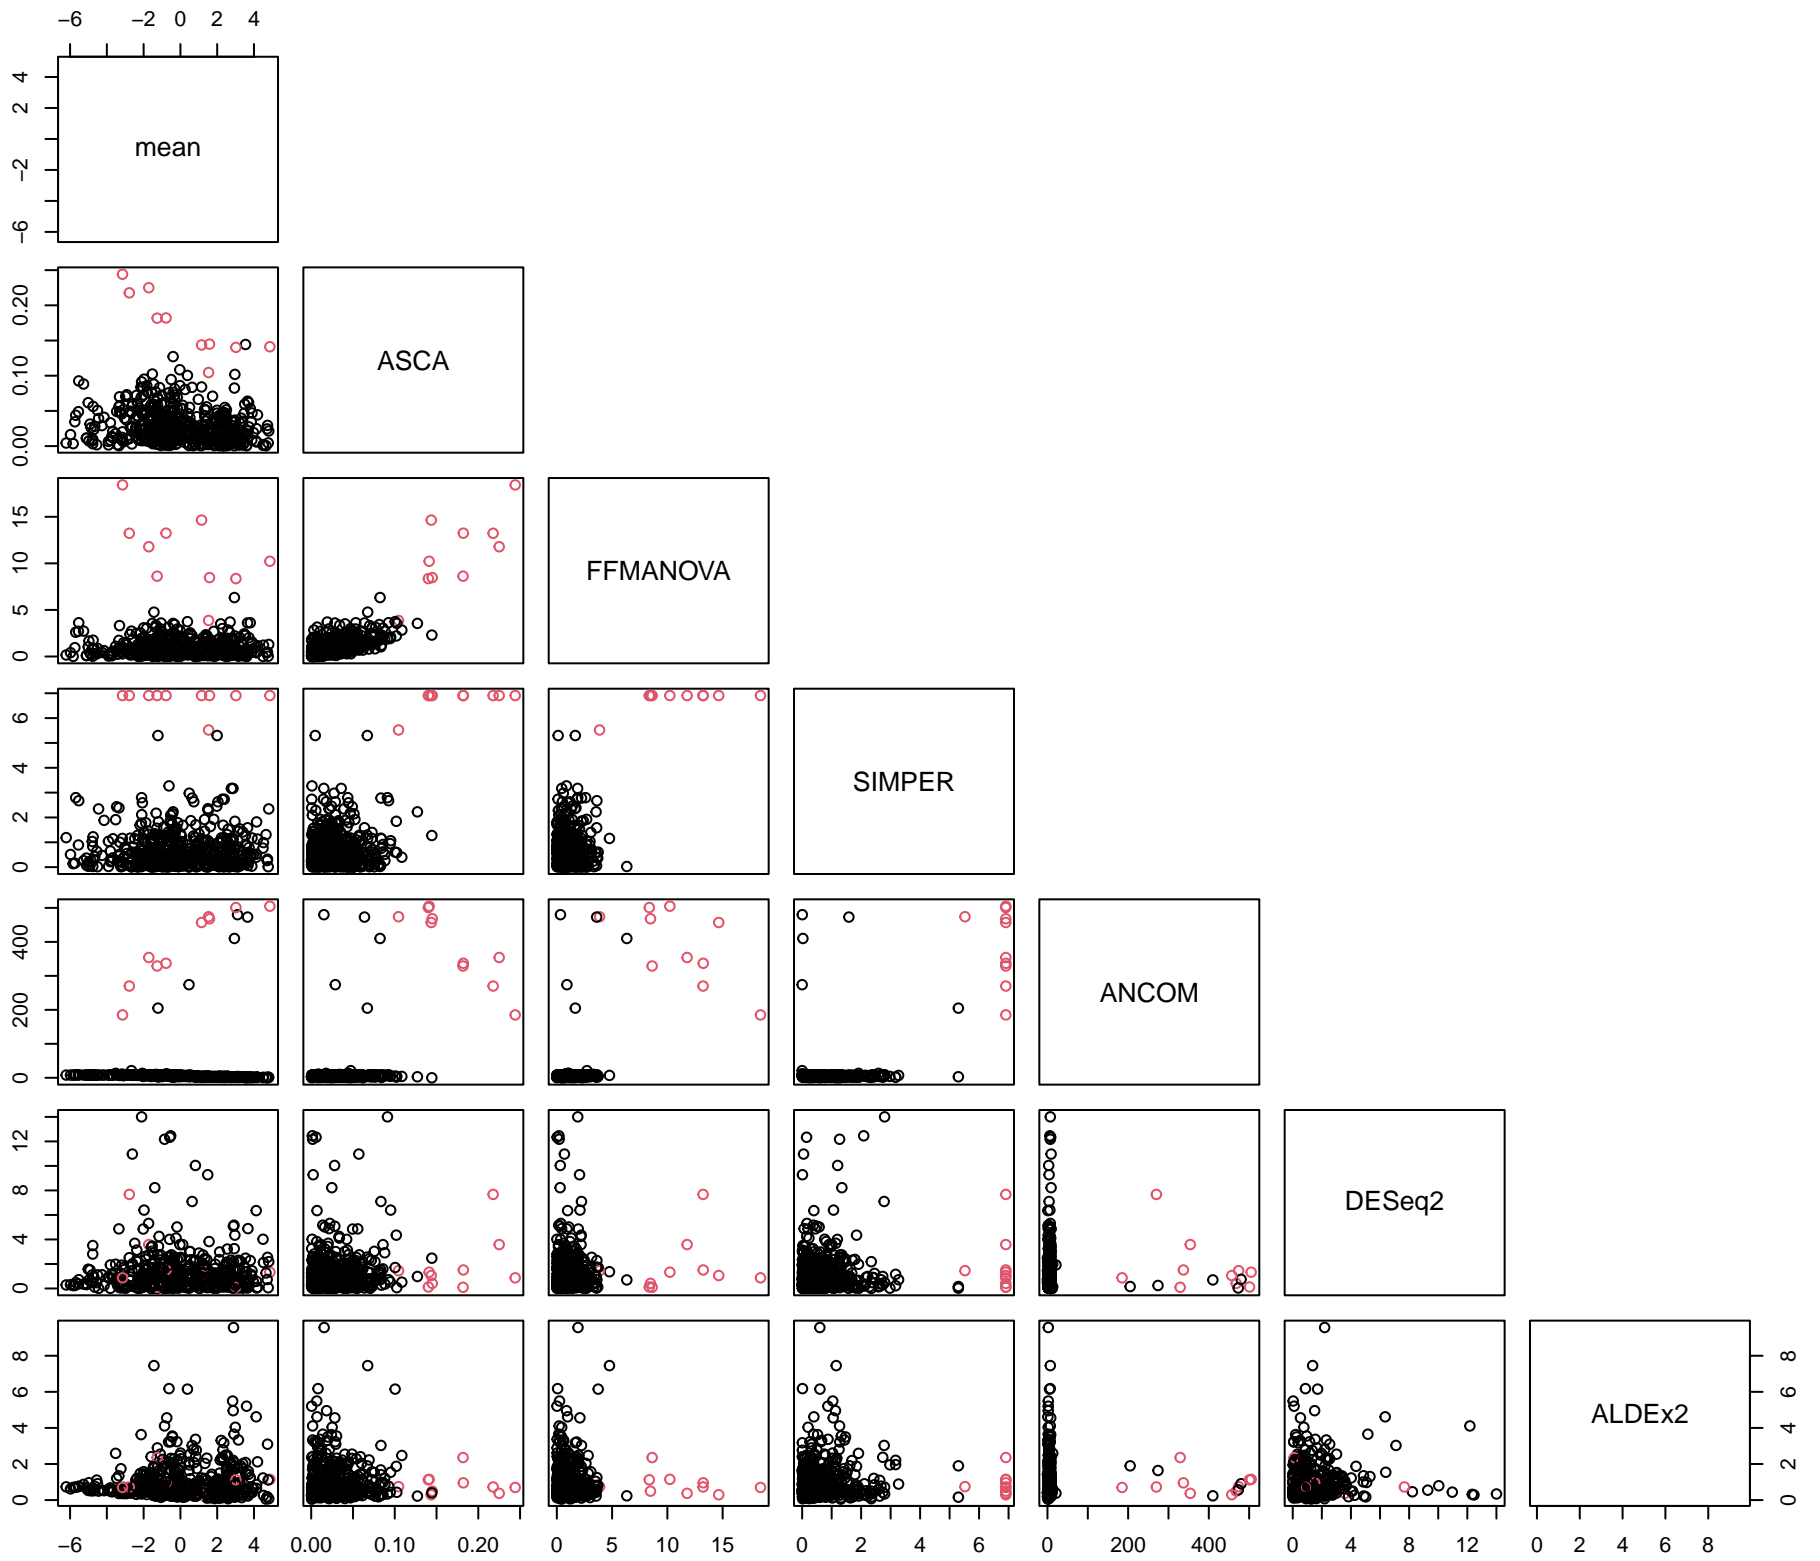

# Few\_High

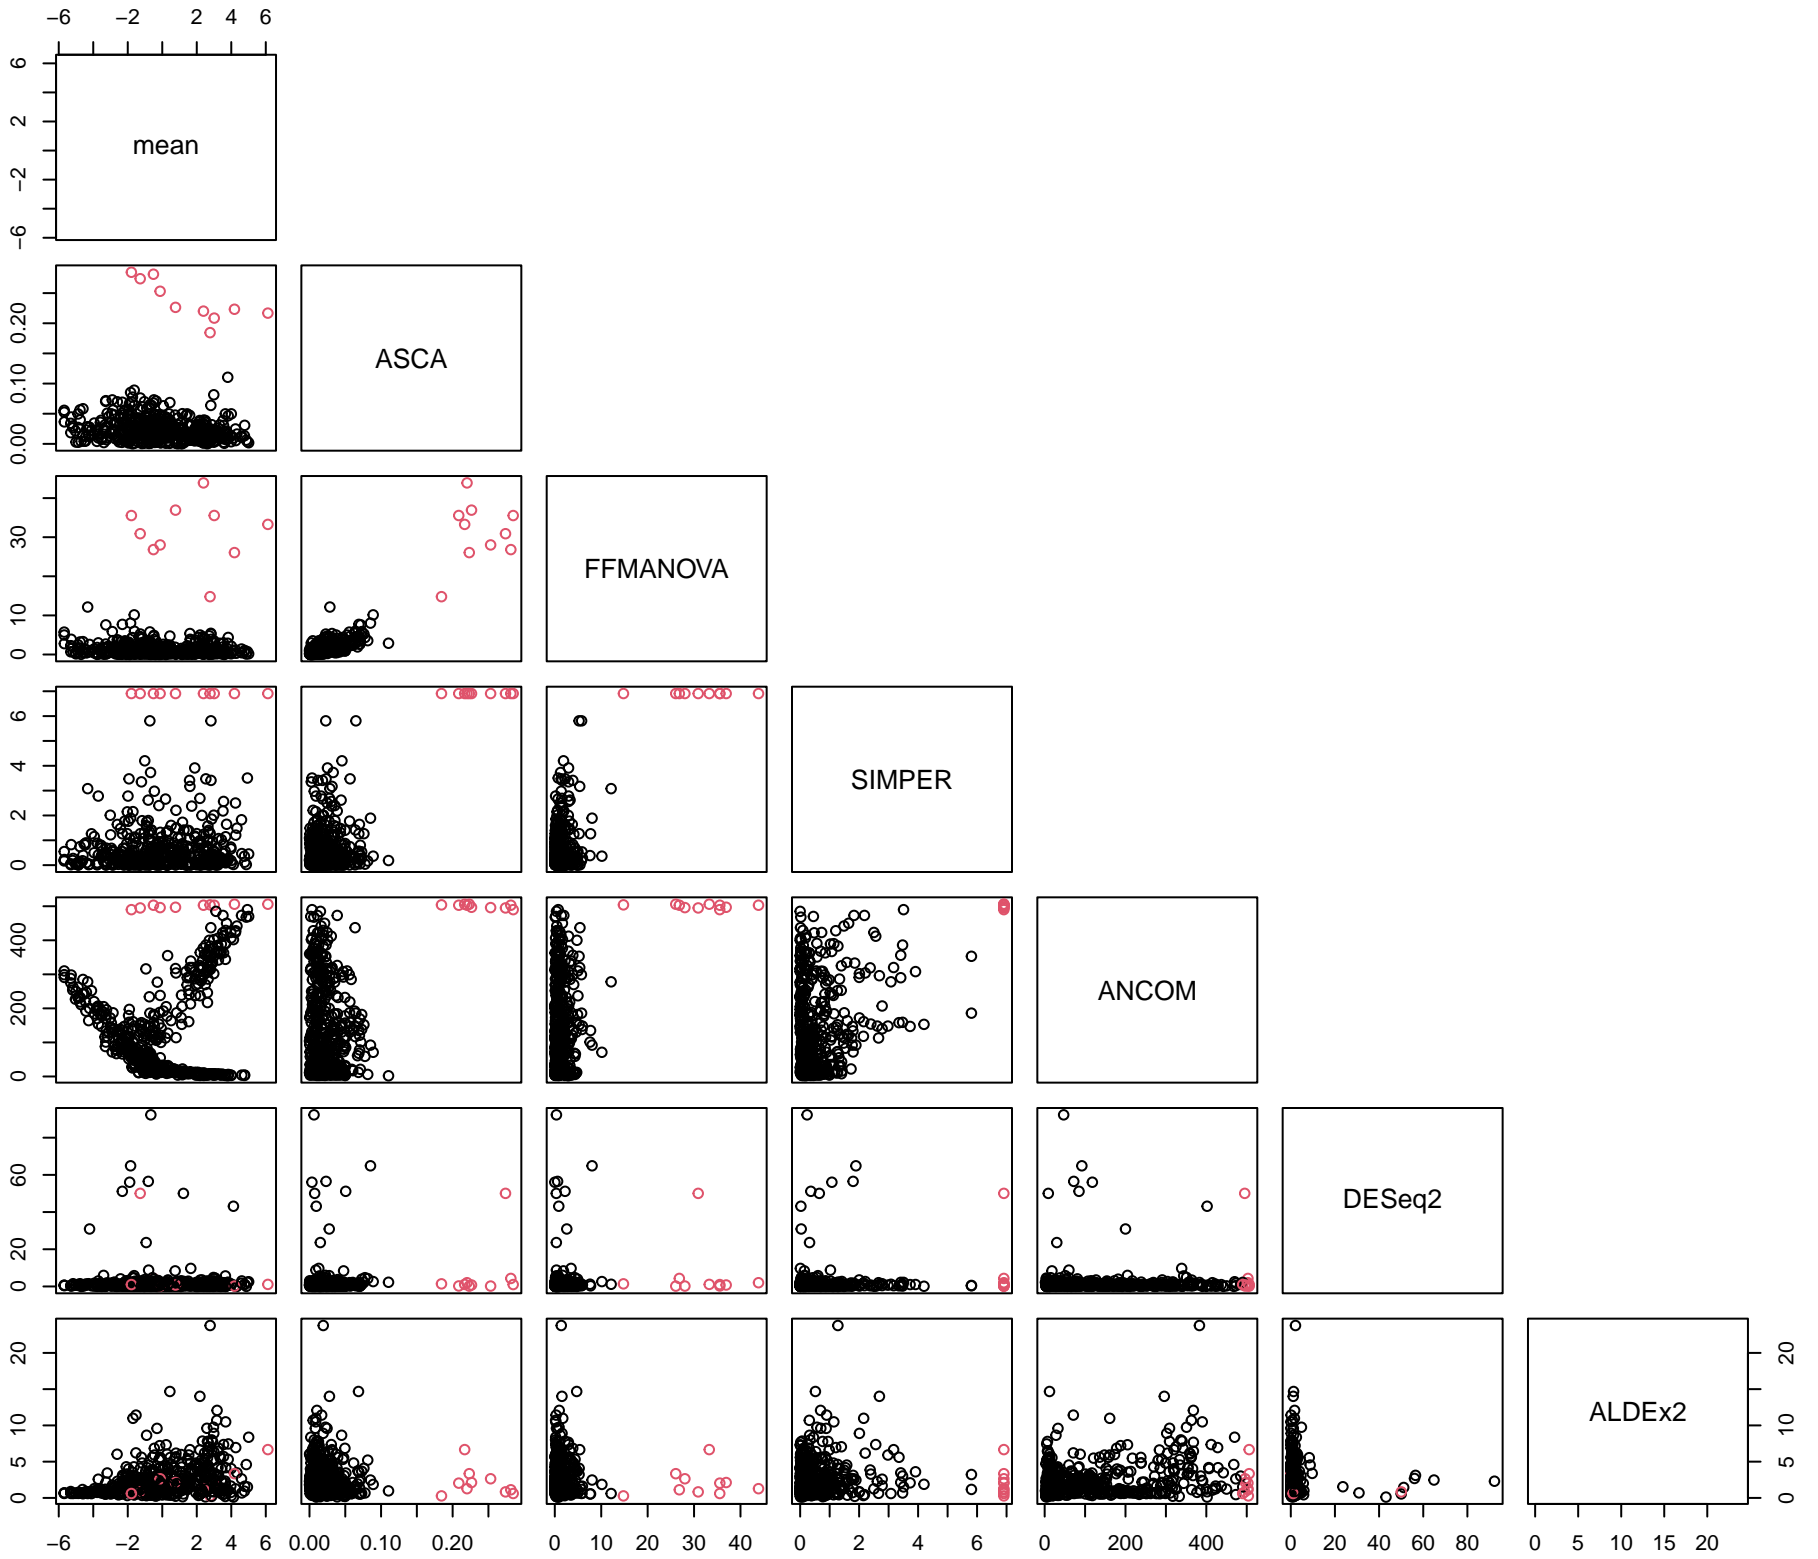

# Many\_Low

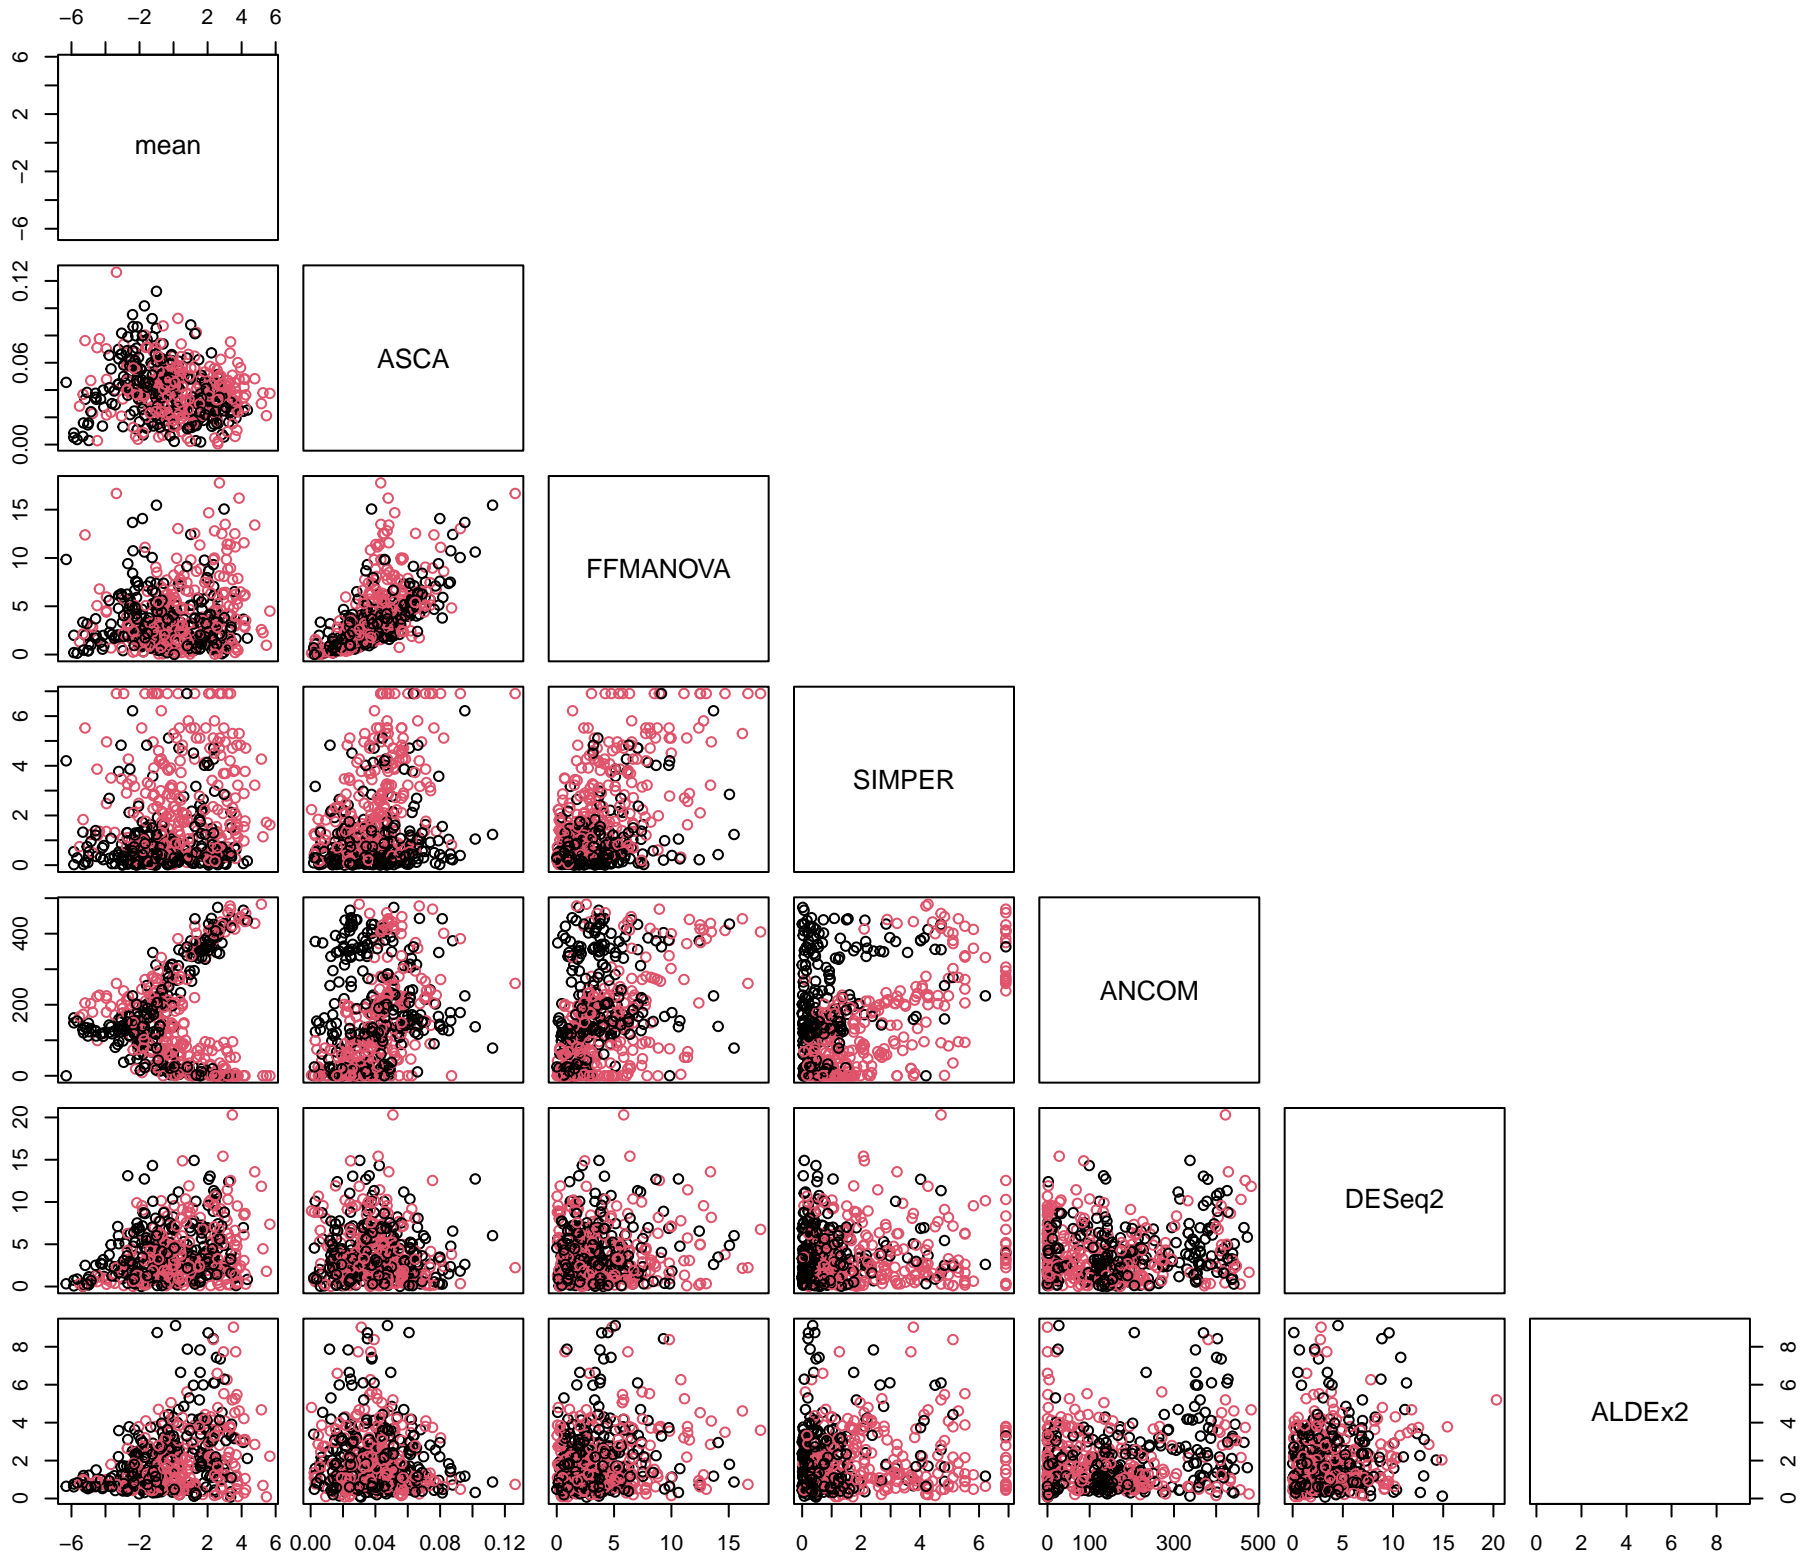

# Many\_High

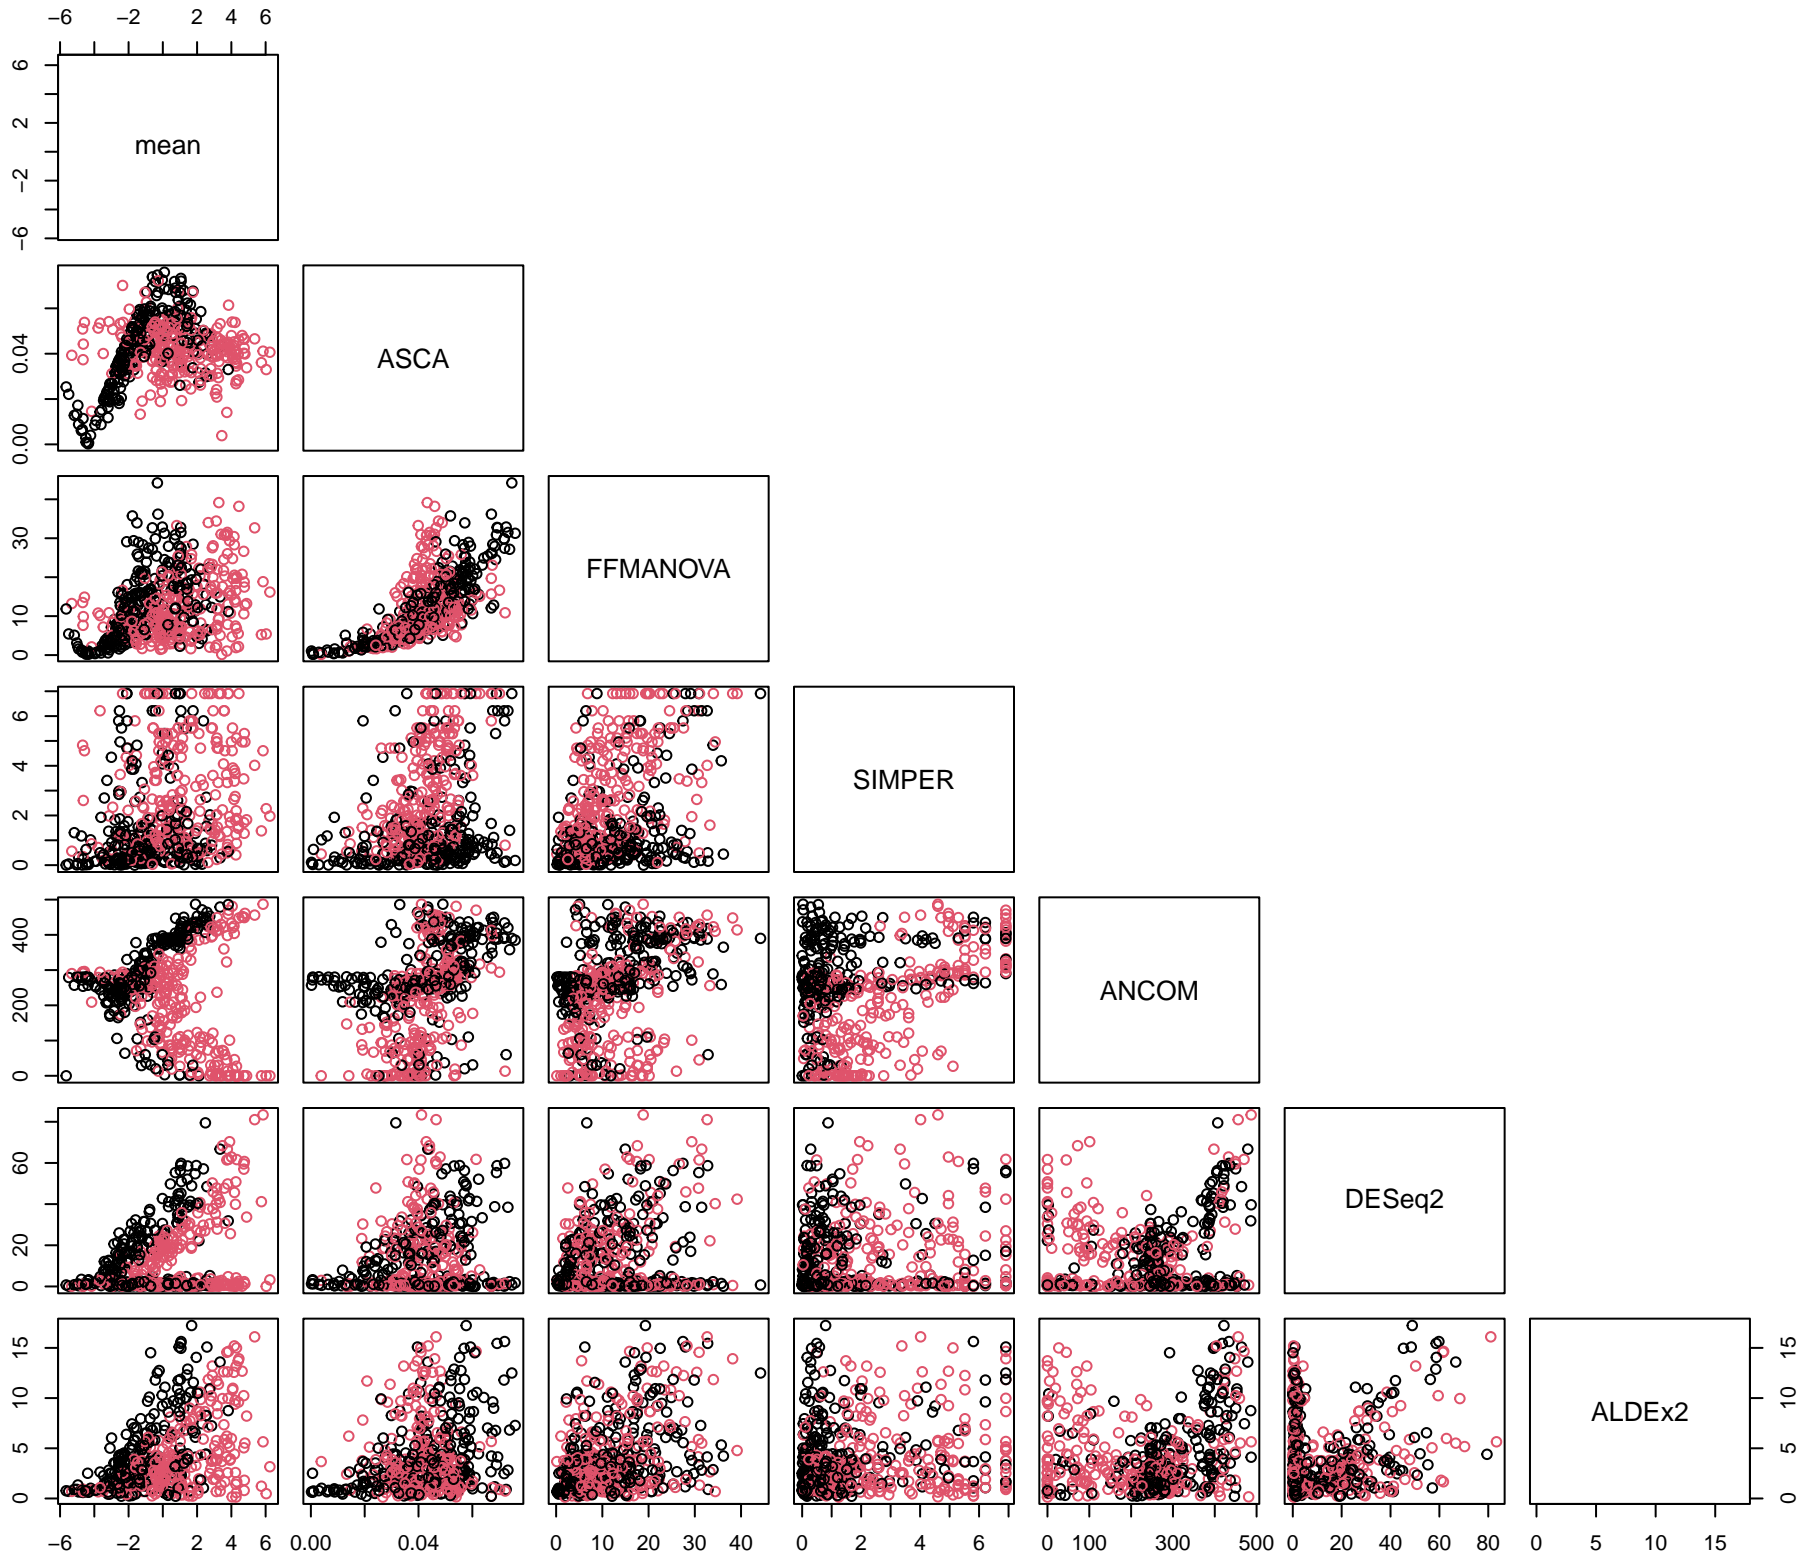

Supplement: pone.0259973.s002.pdf [file pone.0259973.s002.pdf]
